# Supplementary material for: A Deep Learning Model with High Standalone Performance for Diagnosis of Unruptured Intracranial Aneurysm
Source: PubMed Central journal article supplement — Yonsei Med J. 2021 Oct 18;62(11):1052–61. doi: 10.3349/ymj.2021.62.11.1052 (PMC8542476; doi:10.3349/ymj.2021.62.11.1052), 2021-10-18
Supplement: ymj-62-1052-s001.pdf [file ymj-62-1052-s001.pdf]

**Supplementary Table 1.** List of Reference Articles for the Determination of Target Performance and Their Diagnostic Performances on MRA

| Reference | Reader             | Sensitivity |             |                    | Specificity |             |                    |
|-----------|--------------------|-------------|-------------|--------------------|-------------|-------------|--------------------|
|           |                    | Sensitivity | 95% CI      | Half of the 95% CI | Specificity | 95% CI      | Half of the 95% CI |
| 16        | Reader 1           | 0.920       | 0.790–0.980 | 0.095              | 1.000       | 0.630–1.000 | 0.185              |
|           | Reader 2           | 0.970       | 0.860–1.000 | 0.070              | 0.880       | 0.470–1.000 | 0.265              |
|           | Reader 3           | 1.000       | 0.910–1.000 | 0.045              | 0.880       | 0.470–1.000 | 0.265              |
| 17        |                    | 0.992       | 0.971–0.999 | 0.014              | 0.944       | 0.888–0.977 | 0.045              |
| 6         | Observer A         | 0.987       | 0.962–0.997 | 0.018              | 0.948       | 0.904–0.976 | 0.036              |
|           | Observer B         | 0.987       | 0.962–0.997 | 0.018              | 0.943       | 0.897–0.972 | 0.038              |
|           | Observer C         | 0.982       | 0.956–0.995 | 0.020              | 0.932       | 0.884–0.964 | 0.040              |
| 19        | Neuroradiologist A | 0.670       | 0.470–0.830 | 0.180              | 0.900       | 0.730–0.980 | 0.125              |
|           | Neuroradiologist B | 0.700       | 0.510–0.850 | 0.170              | 1.000       | 0.880–1.000 | 0.060              |
| 18        | Observer A         | 0.730       | 0.600–0.830 | 0.115              | 0.940       | 0.860–0.980 | 0.060              |
|           | Observer B         | 0.750       | 0.620–0.850 | 0.115              | 0.940       | 0.860–0.980 | 0.060              |
|           | Mean               | 0.881       |             | 0.078              | 0.937       |             | 0.107              |
|           | Standard deviation | 0.136       |             |                    | 0.040       |             |                    |
|           | Standard error     | 0.041       |             |                    | 0.012       |             |                    |
|           | Half of the 95% CI | 0.081       |             |                    | 0.024       |             |                    |

MRA, magnetic resonance angiography; CI, confidence interval.
