# Supplementary material for: A Deep Learning Model with High Standalone Performance for Diagnosis of Unruptured Intracranial Aneurysm
Source: PubMed Central journal article supplement — Yonsei Med J. 2021 Oct 18;62(11):1052–61. doi: 10.3349/ymj.2021.62.11.1052 (PMC8542476; doi:10.3349/ymj.2021.62.11.1052), 2021-10-18
Supplement: ymj-62-1052-s002.pdf [file ymj-62-1052-s002.pdf]

**Supplementary Table 2.** Number of Examinations according to the Scanner Used

|                     | <b>Training set</b> | <b>Test set</b> |
|---------------------|---------------------|-----------------|
| 3-T Achieva         | 362                 | 187             |
| 1.5-T Achieva       | 31                  | 14              |
| 3-T Trio Tim        | 30                  | 38              |
| 3-T Discovery MR750 | 42                  | 44              |
| 3-T Ingenia         | 3                   | 49              |
