# Supplementary material for: A Deep Learning Model with High Standalone Performance for Diagnosis of Unruptured Intracranial Aneurysm
Source: PubMed Central journal article supplement — Yonsei Med J. 2021 Oct 18;62(11):1052–61. doi: 10.3349/ymj.2021.62.11.1052 (PMC8542476; doi:10.3349/ymj.2021.62.11.1052), 2021-10-18
Supplement: ymj-62-1052-s003.pdf [file ymj-62-1052-s003.pdf]

**Supplementary Table 3.** The Structures of the Deep Learning Algorithms Used in This Study

| <b>A</b>         |                     |            |        |       |        |          |       |
|------------------|---------------------|------------|--------|-------|--------|----------|-------|
| Layer name       | Type                | Activation | Filter |       |        | Output   |       |
|                  |                     |            | Size   | Depth | Stride | Size     | Depth |
| Conv1            | Conv3D              | ReLU       | 3×3×3  | 32    | 1      | 32×32×32 | 32    |
| Conv2_x          | BottleNeck Block ×2 | ReLU       | 1×1×1  | 8     | 1      | 32×32×32 | 32    |
|                  | Conv3D              | ReLU       | 3×3×3  | 8     | 1      |          |       |
|                  | Conv3D              | -          | 1×1×1  | 32    | 1      |          |       |
|                  | Residual            | ReLU       | -      | -     | -      |          |       |
|                  | BottleNeck Block    | ReLU       | 1×1×1  | 8     | 1      | 16×16×16 | 32    |
|                  | Conv3D              | ReLU       | 3×3×3  | 8     | 2      |          |       |
|                  | Conv3D              | -          | 1×1×1  | 32    | 1      |          |       |
|                  | Residual            | ReLU       | -      | -     | -      |          |       |
| Conv3_x          | BottleNeck Block ×3 | ReLU       | 1×1×1  | 16    | 1      | 16×16×16 | 64    |
|                  | Conv3D              | ReLU       | 3×3×3  | 16    | 1      |          |       |
|                  | Conv3D              | -          | 1×1×1  | 64    | 1      |          |       |
|                  | Residual            | ReLU       | -      | -     | -      |          |       |
|                  | BottleNeck Block    | ReLU       | 1×1×1  | 16    | 1      | 8×8×8    | 64    |
|                  | Conv3D              | ReLU       | 3×3×3  | 16    | 2      |          |       |
|                  | Conv3D              | -          | 1×1×1  | 64    | 1      |          |       |
|                  | Residual            | ReLU       | -      | -     | -      |          |       |
| Conv4_x          | BottleNeck Block ×5 | ReLU       | 1×1×1  | 32    | 1      | 8×8×8    | 128   |
|                  | Conv3D              | ReLU       | 3×3×3  | 32    | 1      |          |       |
|                  | Conv3D              | -          | 1×1×1  | 128   | 1      |          |       |
|                  | Residual            | ReLU       | -      | -     | -      |          |       |
|                  | BottleNeck Block    | ReLU       | 1×1×1  | 32    | 1      | 4×4×4    | 128   |
|                  | Conv3D              | ReLU       | 3×3×3  | 32    | 2      |          |       |
|                  | Conv3D              | -          | 1×1×1  | 128   | 1      |          |       |
|                  | Residual            | ReLU       | -      | -     | -      |          |       |
| Conv5_x          | BottleNeck Block ×3 | ReLU       | 1×1×1  | 64    | 1      | 4×4×4    | 256   |
|                  | Conv3D              | ReLU       | 3×3×3  | 64    | 1      |          |       |
|                  | Conv3D              | -          | 1×1×1  | 256   | 1      |          |       |
|                  | Residual            | ReLU       | -      | -     | -      |          |       |
| Output           | Average pool        | Sigmoid    | -      | -     | -      | 1×1×1    | 1     |
| <b>B</b>         |                     |            |        |       |        |          |       |
| Layer name       | Type                | Activation | Filter |       |        | Output   |       |
|                  |                     |            | Size   | Depth | Stride | Size     | Depth |
| Contracting path |                     |            |        |       |        |          |       |
| Conv1_x          | Conv3D              | ReLU       | 3×3×3  | 32    | 1      | 16×16×16 | 32    |
|                  | Conv3D              | ReLU       | 3×3×3  | 32    | 1      |          |       |
|                  | Max Pool            | -          | 2×2×2  | -     | 2      |          |       |
| Conv2_x          | Conv3D              | ReLU       | 3×3×3  | 64    | 1      | 8×8×8    | 64    |
|                  | Conv3D              | ReLU       | 3×3×3  | 64    | 1      |          |       |
|                  | Max Pool            | -          | 2×2×2  | -     | 2      |          |       |
| Conv3_x          | Conv3D              | ReLU       | 3×3×3  | 128   | 1      | 4×4×4    | 128   |
|                  | Conv3D              | ReLU       | 3×3×3  | 128   | 1      |          |       |
|                  | Max Pool            | -          | 2×2×2  | -     | 2      |          |       |
| Conv4_x          | Conv3D              | ReLU       | 3×3×3  | 256   | 1      | 4×4×4    | 128   |
|                  | Conv3D              | ReLU       | 3×3×3  | 128   | 1      |          |       |
| Expansive path   |                     |            |        |       |        |          |       |
| Conv5_x          | Concat              | -          | -      | -     | -      | 8×8×8    | 256   |
|                  | Conv3D              | ReLU       | 3×3×3  | 128   | 1      |          | 64    |
|                  | Conv3D              | ReLU       | 3×3×3  | 64    | 1      |          |       |
| Conv6_x          | Concat              | -          | -      | -     | -      | 16×16×16 | 128   |
|                  | Conv3D              | ReLU       | 3×3×3  | 64    | 1      |          | 32    |
|                  | Conv3D              | ReLU       | 3×3×3  | 32    | 1      |          |       |
| Conv7_x          | Concat              | -          | -      | -     | -      | 32×32×32 | 64    |
|                  | Conv3D              | ReLU       | 3×3×3  | 32    | 1      |          | 32    |
|                  | Conv3D              | ReLU       | 3×3×3  | 32    | 1      |          |       |
| Output           | Conv3D              | Sigmoid    | -      | -     | -      | 32×32×32 | 1     |

(A) The structure of the 3D ResNet algorithm used in this study. Several changes have been made to the original 2D ResNet algorithm. Conv2D was replaced with conv3D. Also, the number of pooling and the depth of convolution filters were reduced, since the input was a 32×32×32-sized patch. Finally, the 1000-d fc was removed, since the task in this model was binary classification. (B) The structure of the 3D Unet algorithm used in this study. Similar changes have also been made to the original 2D Unet algorithm.
